# Supplementary material for: BRAF inhibition improves tumor recognition by the immune system: Potential implications for combinatorial therapies against melanoma involving adoptive T-cell transfer
Source: PubMed Central journal article supplement — Oncoimmunology. 2012 Dec 1;1(9):1476–83. doi: 10.4161/onci.21940 (PMC3525603; doi:10.4161/onci.21940), 2012-12-01
Supplement: onci-1-1476-s01.pdf [file onci-1-1476-s01.pdf]

## **Supplemental Material to:**

**Marco Donia, Paolo Fagone, Ferdinando Nicoletti, Rikke Sick Andersen, Estrid Høgdall, Per Thor Straten, Mads Hald Andersen and Inge Marie Svane**

**BRAF inhibition improves tumor recognition by the immune system:**

**Potential implications for combinatorial therapies against melanoma involving adoptive T-cell transfer**

**Oncoimmunology 2012; 1(9)**

**<http://dx.doi.org/10.4161/onci.21940>**

**<http://www.landesbioscience.com/journals/oncoimmunology/article/21940/>**

Supplementary Figures

Supplementary Figure S1

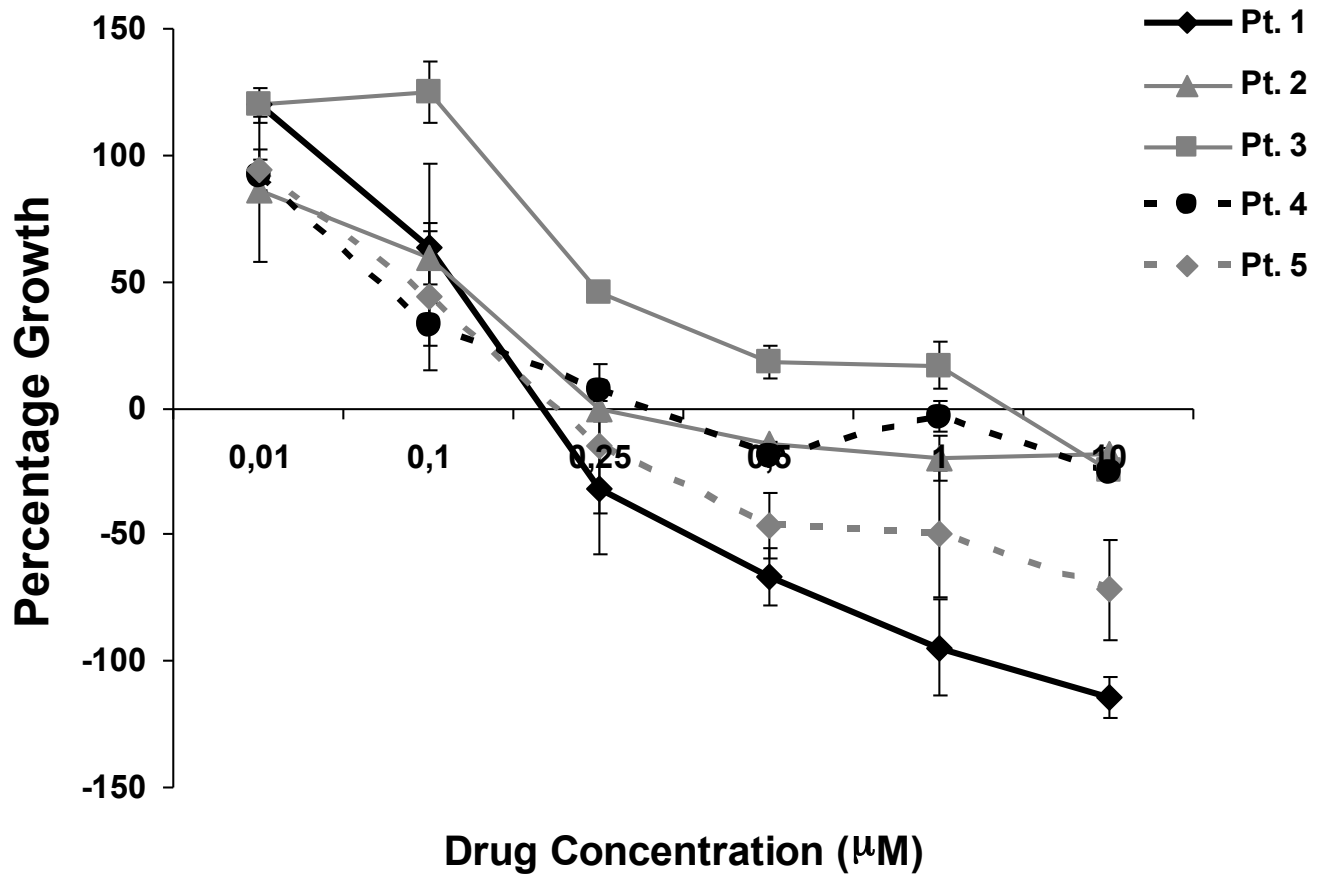

**Sensitivity of short-term cultured melanoma cell lines to vem.** Short-term cultured melanoma cell lines were seeded into 24 well plates and, after 24 hours, various concentrations of vem were added. Growth inhibition was evaluated after 72 hours of incubation. Pt. : patient

## Supplementary Tables

### Supplementary Table S2. Full list of TAAs known to be immunogenic in melanoma

|                   |                      |                  |
|-------------------|----------------------|------------------|
| MART-2            | AIM-2                | TRP-1 / gp75     |
| NY-ESO-1 /        |                      |                  |
| LAGE-2            | BAGE-1               | MAGE-A6          |
| MAGE-A1           | Bcl-2                | OA1              |
| MAGE-A10          | Bcl-xL               | TAG              |
| MAGE-A12          | beta-catenin         | TAG-1            |
| MAGE-A2           | BING-4               | Telomerase       |
| MAGE-A3           | B-RAF                | SSX-2            |
| MAGE-A4           | BRAF600              | TRAG-3           |
| 707-AP            | Livin (ML-IAP)       | TRG              |
| LAGE-1            | CDKN2A               | survivin-2B      |
| MAGE-C2           | MAGE-A9              | SNRPD1           |
| IDO1              | cyclin B1            | Survivin         |
| MC1R              | CYP1B1               | TRP-2            |
| Melan-A /         | DAM-6, -10 (MAGE-B1, |                  |
| MART-1            | -B2)                 | TRP2-6b          |
| Meloe-1           | XBP-1                | TRP2-INT2        |
| Meloe-2           | p15                  | tyrosinase       |
| MG50              | EFTUD2               | RhoC             |
| MUM-1             | EphA2                | OS-9             |
| MUM-2             | GAGE-1,2,8           | RAB38 / NY-MEL-1 |
| MUM-3             | GnTV                 | PRDX5            |
| N-ras             | gp100 / Pmel17       | PRAME            |
| MAGE-A8           | HERV-K-MEL           | P Polypeptide    |
| CML28<br>(EXOSC5) | CDK4                 |                  |

**Supplementary Table S3.** Full list of the “MHCI-restricted antigen processing and presentation pathway” genes

|          |       |
|----------|-------|
| TAPBP    | HLA-G |
| B2M      | NFYA  |
| CREB1    | NFYB  |
| Canx     | nfyc  |
| CALR     | PSME1 |
| Hspa11   | PSME2 |
| HSPA1A   | PSME3 |
| HSPA1B   | PDIA3 |
| Hspa2    | TAP1  |
| HSPA4    | TAP2  |
| HSPA6    |       |
| HSPA7    |       |
| HSPA8    |       |
| HSP90AA1 |       |
| HSP90AA2 |       |
| HSP90AB1 |       |
| HSPA5    |       |
| ifi30    |       |
| LGMN     |       |
| Ita      |       |
| HLA-A    |       |
| HLA-E    |       |
| HLA-F    |       |
